# Supplementary material for: Population-scale hand tremor analysis via anonymized mouse cursor signals
Source: PubMed Central journal article supplement (PMC6760188; doi:10.1038/s41746-019-0171-4), 2019-09-24
Supplement: 41746_2019_171_MOESM1_ESM.pdf [file 41746_2019_171_MOESM1_ESM.pdf]

**Supplementary Table 1.** Experiential diagnostic query patterns. Query pattern and relative position of medical condition is one of “Condition before or after” (condition appears immediately before or immediately after pattern in the query) or “Condition after” (condition appears immediately after pattern in the query). These patterns and conditions are used to automatically identify first-person experiential diagnostic queries in search logs. Queries matching these patterns are further filtered to exclude questions, those related to other individuals (e.g., friends, colleagues, relatives), those related to domestic animals, and so on.

| <b>Pattern</b>                 | <b>Relative Condition Position in Query</b> |
|--------------------------------|---------------------------------------------|
| i was diagnosed                | Condition before or after                   |
| i got diagnosed                | Condition before or after                   |
| i was just diagnosed           | Condition before or after                   |
| i was recently diagnosed       | Condition before or after                   |
| i have been diagnosed          | Condition before or after                   |
| i have just been diagnosed     | Condition before or after                   |
| i have recently been diagnosed | Condition before or after                   |
| what now                       | Condition before or after                   |
| what next                      | Condition before or after                   |
| what happens now               | Condition before or after                   |
| what happens next              | Condition before or after                   |
| what comes now                 | Condition before or after                   |
| what comes next                | Condition before or after                   |
| what can i expect              | Condition before or after                   |
| what should i expect           | Condition before or after                   |
| what can i eat                 | Condition before or after                   |
| what should i eat              | Condition before or after                   |
| what can i do                  | Condition before or after                   |
| what should i do               | Condition before or after                   |
| what to expect                 | Condition before or after                   |
| what to eat                    | Condition before or after                   |
| what to do                     | Condition before or after                   |
| what do i do                   | Condition before or after                   |
| how do i cope                  | Condition before or after                   |
| how can i cope                 | Condition before or after                   |
| how should i cope              | Condition before or after                   |
| how will i cope                | Condition before or after                   |
| what is my life expectancy     | Condition before or after                   |
| how long until i die           | Condition before or after                   |
| will i die                     | Condition before or after                   |
| how long will i live           | Condition before or after                   |
| how long do i have to live     | Condition before or after                   |
| how long do i have             | Condition before or after                   |

| <b>Pattern (cont.)</b>  | <b>Relative Condition Position (cont.)</b> |
|-------------------------|--------------------------------------------|
| affairs in order        | Condition before or after                  |
| just diagnosed          | Condition after                            |
| just been diagnosed     | Condition after                            |
| been diagnosed          | Condition after                            |
| diagnosed with          | Condition after                            |
| diagnosed as            | Condition after                            |
| diagnosed with a        | Condition after                            |
| recently diagnosed      | Condition after                            |
| recently been diagnosed | Condition after                            |
| just been told i am     | Condition after                            |
| just been told i m      | Condition after                            |
| just been told i have   | Condition after                            |
| just been told i have a | Condition after                            |
| been told i am          | Condition after                            |
| been told i m           | Condition after                            |
| been told i have        | Condition after                            |
| been told i have a      | Condition after                            |
| told i am               | Condition after                            |
| told i m                | Condition after                            |
| told i have             | Condition after                            |
| told i have a           | Condition after                            |
| dr says i am            | Condition after                            |
| dr says i m             | Condition after                            |
| dr says i have          | Condition after                            |
| dr says i have a        | Condition after                            |
| dr told me i am         | Condition after                            |
| dr told me i m          | Condition after                            |
| dr told me i have       | Condition after                            |
| dr told me i have a     | Condition after                            |
| dr said me i am         | Condition after                            |
| dr said me i m          | Condition after                            |
| dr said i have          | Condition after                            |
| dr said i have a        | Condition after                            |
| doctor says i am        | Condition after                            |
| doctor says i m         | Condition after                            |
| doctor says i have      | Condition after                            |
| doctor says i have a    | Condition after                            |
| doctor told me i am     | Condition after                            |
| doctor told me i m      | Condition after                            |
| doctor told me i have   | Condition after                            |

| <b>Pattern (cont.)</b>      | <b>Relative Condition Position (cont.)</b> |
|-----------------------------|--------------------------------------------|
| doctor told me i have a     | Condition after                            |
| doctor said i am            | Condition after                            |
| doctor said i m             | Condition after                            |
| doctor said i have          | Condition after                            |
| doctor said i have a        | Condition after                            |
| physician says i am         | Condition after                            |
| physician says i m          | Condition after                            |
| physician says i have       | Condition after                            |
| physician told me i m       | Condition after                            |
| physician told me i am      | Condition after                            |
| physician told me i have    | Condition after                            |
| physician told me i have a  | Condition after                            |
| physician said i m          | Condition after                            |
| physician said i am         | Condition after                            |
| physician said i have       | Condition after                            |
| physician said i have a     | Condition after                            |
| dr diagnosed me with        | Condition after                            |
| dr diagnosed me as          | Condition after                            |
| doctor diagnosed me with    | Condition after                            |
| doctor diagnosed me as      | Condition after                            |
| physician diagnosed me with | Condition after                            |
| physician diagnosed me as   | Condition after                            |
| had a                       | Condition after                            |
| just had a                  | Condition after                            |
| just got a                  | Condition after                            |
| recently got a              | Condition after                            |
| i had a                     | Condition after                            |
| i have                      | Condition after                            |
| i have the                  | Condition after                            |
| i have a                    | Condition after                            |
| i got                       | Condition after                            |
| i got the                   | Condition after                            |
| i got a                     | Condition after                            |
| got a                       | Condition after                            |
| have a                      | Condition after                            |
| now i am                    | Condition after                            |
| now i m                     | Condition after                            |
| now i have                  | Condition after                            |
| now i have the              | Condition after                            |
| now i have a                | Condition after                            |

| <b>Pattern (cont.)</b>   | <b>Relative Condition Position (cont.)</b> |
|--------------------------|--------------------------------------------|
| now i got                | Condition after                            |
| now i got the            | Condition after                            |
| now i got a              | Condition after                            |
| diagnosed                | Condition after                            |
| why have i got           | Condition after                            |
| why have i got a         | Condition after                            |
| why did i get            | Condition after                            |
| why did i get a          | Condition after                            |
| why do i have            | Condition after                            |
| why do i have a          | Condition after                            |
| why did i have a         | Condition after                            |
| why was i diagnosed with | Condition after                            |
| my                       | Condition after                            |
| diagnosed me with        | Condition after                            |
| diagnosed me as          | Condition after                            |
| diagnosed as having      | Condition after                            |
| diagnosed as having a    | Condition after                            |
| diagnosed as being       | Condition after                            |
